# Supplementary material for: The Fault Diagnosis of Rolling Bearing Based on Variational Mode Decomposition and Iterative Random Forest
Source: Hindawi journal article supplement (doi:10.1155/2020/1576150), 2020-02-12
Supplement: f1 [file 1576150.f1.xlsx]

## Sheet: FE_data_output
EMD-C5.0		NOR	BF	IRF	ORF
	NOR	18	0	0	0
	BF	0	30	2	6
	IRF	1	1	28	0
	ORF	0	4	0	26
EMD-SVM		NOR	BF	IRF	ORF
	NOR	18	0	0	0
	BF	0	28	1	9
	IRF	0	0	30	0
	ORF	0	1	0	29
EMD-RF		NOR	BF	IRF	ORF
	NOR	18	0	0	0
	BF	0	37	0	1
	IRF	0	0	29	1
	ORF	0	4	0	26
EMD-iRF		NOR	BF	IRF	ORF
	NOR	18	0	0	0
	BF	0	37	0	1
	IRF	0	0	30	0
	ORF	0	2	0	28
EEMD-C5.0		NOR	BF	IRF	ORF
	NOR	23	0	3	0
	BF	0	18	1	3
	IRF	0	1	36	1
	ORF	0	3	0	31
EEMD-SVM		NOR	BF	IRF	ORF
	NOR	25	0	1	0
	BF	0	18	1	3
	IRF	0	0	38	0
	ORF	0	6	0	28
EEMD-RF		NOR	BF	IRF	ORF
	NOR	26	0	0	0
	BF	0	21	0	1
	IRF	1	0	37	0
	ORF	0	4	0	30
EEMD-iRF		NOR	BF	IRF	ORF
	NOR	26	0	0	0
	BF	0	21	0	1
	IRF	0	0	37	1
	ORF	0	1	0	33
VMD-C5.0		NOR	BF	IRF	ORF
	NOR	39	0	0	0
	BF	0	28	2	2
	IRF	0	0	27	0
	ORF	0	1	0	25
VMD-SVM		NOR	BF	IRF	ORF
	NOR	39	0	0	0
	BF	0	30	0	2
	IRF	0	0	27	0
	ORF	0	0	0	26
VMD-RF		NOR	BF	IRF	ORF
	NOR	39	0	0	0
	BF	0	31	0	1
	IRF	0	0	27	0
	ORF	0	0	0	26
VMD-iRF		NOR	BF	IRF	ORF
	NOR	39	0	0	0
	BF	0	32	0	0
	IRF	0	0	27	0
	ORF	0	0	0	26
